# Supplementary material for: A Hybrid Random Forest and Least Squares Support Vector Machine Model Based on Particle Swarm Optimization Algorithm for Slope Stability Prediction: A Case Study in Sichuan–Tibet Highway, China
Source: Hindawi journal article supplement (doi:10.1155/2023/6651323), 2023-09-11
Supplement: f1 [file 6651323.f1.docx]

Supplementary Material

## Supplementary Material

The slope data are divided into two categories: quantitative data and qualitative data. The data are shown in [Table](file:///C:\Users\Stwho_1998\Desktop\Manuscript.docx#Table1) 4. The quantitation and standardization of influencing factors of slope stability of the Sichuan‒Tibet highway are shown in Table 5. The influencing factors become dimensionless values by quantifying, as shown in Table 6. The evaluation indices were made dimensionless by normalization, as shown in Table 7.

Table 4: Partial sample original data.

| Sample | X1 | X2 (mm) | X3 (%) | X4 (m) | X5 (°) | X6 | X7 | X8 | X9 | X10 |
| --- | --- | --- | --- | --- | --- | --- | --- | --- | --- | --- |
| 1 | Rock Slope | 640.1 | 88 | 38 | 41 | Step‒shaped | None | Unweathered | Medium compact | Medium |
| 2 | Soil Slope | 244.3 | 35 | 20 | 35 | Convex | Water seepage | Slightly weathered | Incompact | Little |
| 3 | Artificial Slope | 414.1 | 71 | 87 | 29 | Linear | Wetted | Unweathered | Compact | Tiny |
| … | … | … | … | … | … | … | … | … | … | … |
| 151 | Natural Slope | 127 | 10 | 17 | 32 | Linear | None | Medium weathered | Incompact | Little |
| 152 | Rock Slope | 387 | 41 | 128 | 27 | Concave | Water seepage | Strongly weathered | Slightly compact | Medium |

Table 5: Slope stability evaluation indices quantitative classification table of Sichuan‒Tibet Highway.

|  | Index Classification Standard (Score) | | | |
| --- | --- | --- | --- | --- |
| Evaluation Indices | [0.00‒0.25) | [0.25‒0.50) | [0.50‒0.75) | [0.75‒1.00] |
| Slope Type (X1) | Natural Slope | Artificial Slope | Soil Slope | Rock  Slope |
| Slope Shape (X6) | Concave | Linear | Step‒shaped | Convex |
| Groundwater (X7) | None | Wetted | Water seepage | Springs exposed |
| Weathering Depth (X8) | Unweathered | Slightly weathered | Medium weathered | Strongly weathered |
| Dense degree of soil(X9) | Compact | Slightly compact | Medium compact | Incompact |
| Human Factors (X10) | Tiny | Little | Medium | Large |

Table 6: Quantified slope sample data.

| Sample | X1 | X2 | X3 | X4 | X5 | X6 | X7 | X8 | X9 | X10 | I1 |
| --- | --- | --- | --- | --- | --- | --- | --- | --- | --- | --- | --- |
| 1 | 0.81 | 640.1 | 88% | 38 | 41 | 0.61 | 0.12 | 0.12 | 0.13 | 0.61 | 1 |
| 2 | 0.64 | 244.3 | 35% | 20 | 35 | 0.87 | 0.64 | 0.31 | 0.68 | 0.32 | 1 |
| 3 | 0.32 | 414.1 | 71% | 87 | 29 | 0.35 | 0.34 | 0.10 | 0.48 | 0.13 | 0 |
| … | … | … | … | … | … | … | … | … | … | … | … |
| 151 | 0.16 | 127 | 10% | 17 | 32 | 0.42 | 0.13 | 0.56 | 0.37 | 0.31 | 1 |
| 152 | 0.93 | 387 | 41% | 128 | 27 | 0.83 | 0.68 | 0.86 | 0.10 | 0.59 | 0 |
| 153 | 0.41 | 444 | 51% | 45 | 35 | 0.91 | 0.70 | 0.65 | 0.63 | 0.81 | 1 |

Table 7: Part of slope data after normalization.

| Sample | X1 | X2 | X3 | X4 | X5 | X6 | X7 | X8 | X9 | X10 | I1 |
| --- | --- | --- | --- | --- | --- | --- | --- | --- | --- | --- | --- |
| 1 | 0.84 | 1.00 | 1.00 | 0.19 | 1.00 | 0.46 | 0.00 | 0.03 | 0.05 | 0.71 | 1 |
| 2 | 0.62 | 0.23 | 0.32 | 0.03 | 0.57 | 0.93 | 0.89 | 0.28 | 1.00 | 0.28 | 1 |
| 3 | 0.21 | 0.56 | 0.78 | 0.63 | 0.14 | 0.00 | 0.38 | 0.00 | 0.66 | 0.00 | 0 |
| … | … | … | … | … | … | … | … | … | … | … | … |
| 151 | 0.00 | 0.00 | 0.00 | 0.00 | 0.36 | 0.13 | 0.02 | 0.61 | 0.47 | 0.26 | 1 |
| 152 | 1.00 | 0.51 | 0.41 | 1.00 | 0.00 | 0.86 | 0.97 | 1.00 | 0.00 | 0.68 | 0 |
| 153 | 0.32 | 0.62 | 0.53 | 0.25 | 0.57 | 1.00 | 1.00 | 0.72 | 0.91 | 1.00 | 1 |
